# Supplementary material for: KCNK10, a Tandem Pore Domain Potassium Channel, Is a Regulator of Mitotic Clonal Expansion during the Early Stage of Adipocyte Differentiation
Source: MDPI journal article supplement (doi:10.3390/ijms151222743), 2014-12-09

# Supplementary Information

**Figure S1.** Effect of *kcnk10* knockdown on the phosphorylation and protein levels of Akt and C/EBP $\beta$  and the protein level of C/EBP $\delta$  when used lot 1 samples. Arrowheads indicate nonspecific bands.

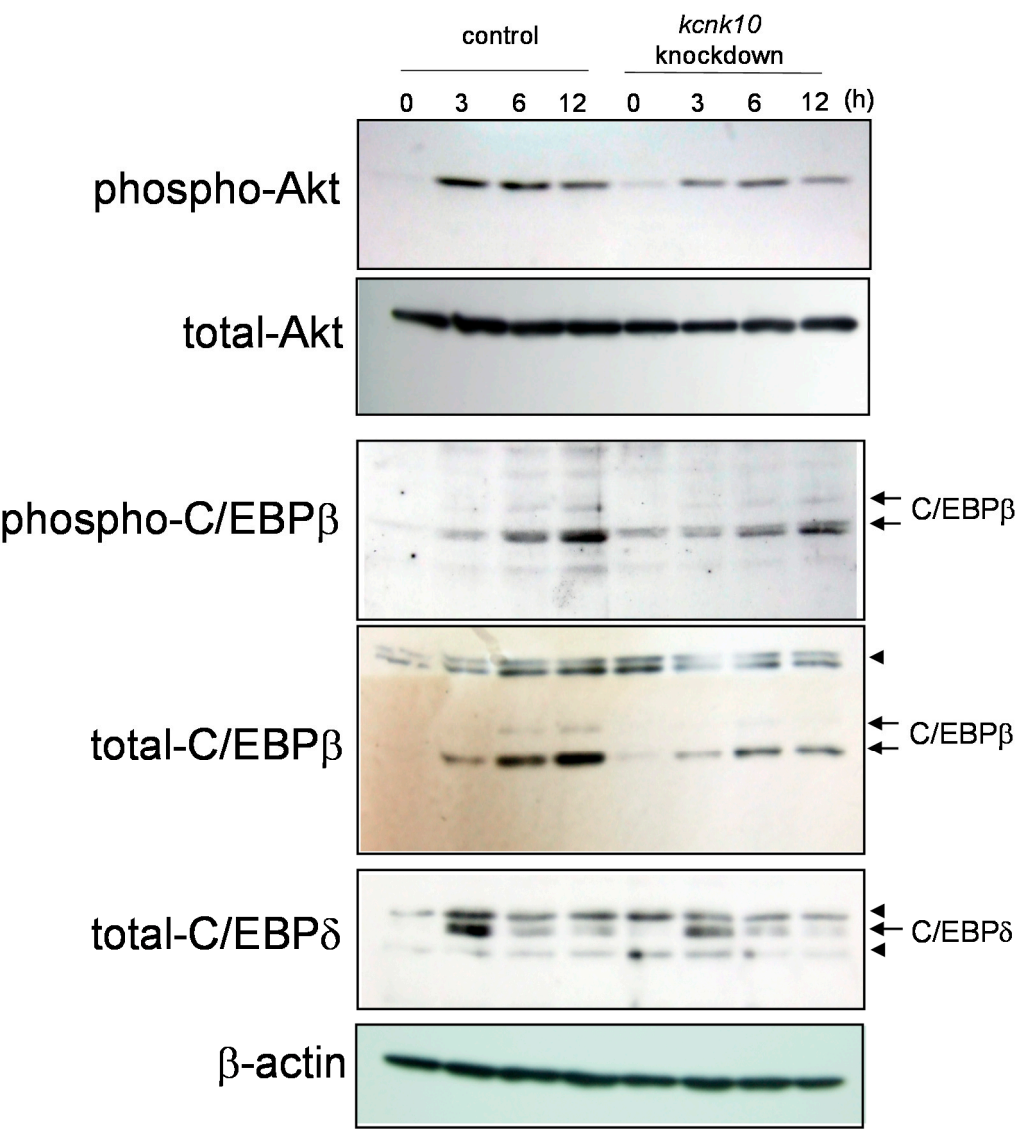

**Figure S2.** Effect of *kcnk10* knockdown on the phosphorylation and protein levels of Akt and C/EBP $\beta$  and the protein level of C/EBP $\delta$  when used lot 2 samples. Arrowheads indicate nonspecific bands.

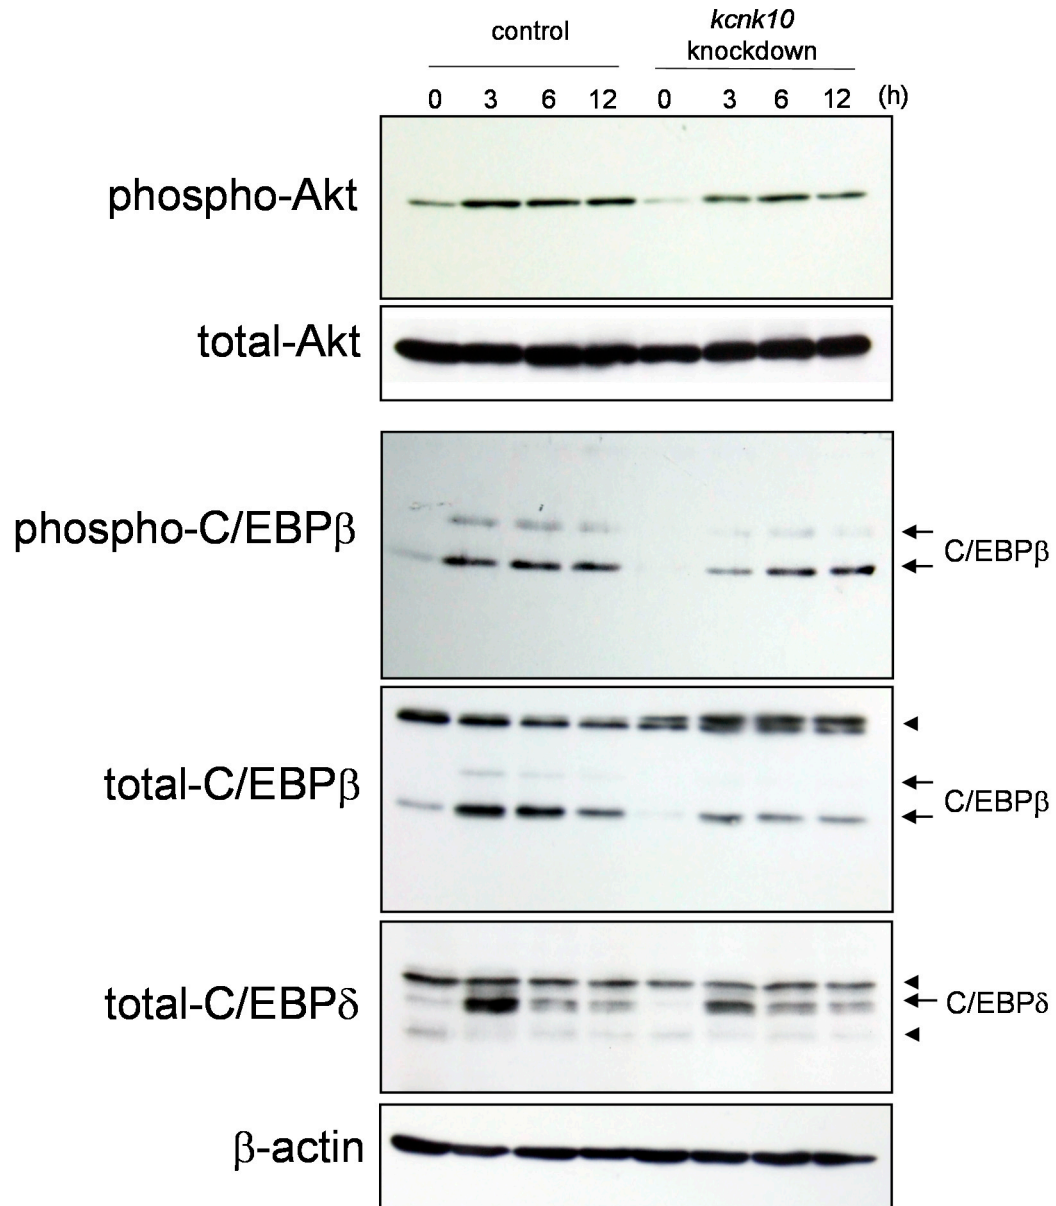

**Figure S3.** Effect of *kcnk10* knockdown on the phosphorylation and protein levels of Akt and C/EBP $\beta$  and the protein level of C/EBP $\delta$  when used lot 3 samples. Arrowheads indicate nonspecific bands.

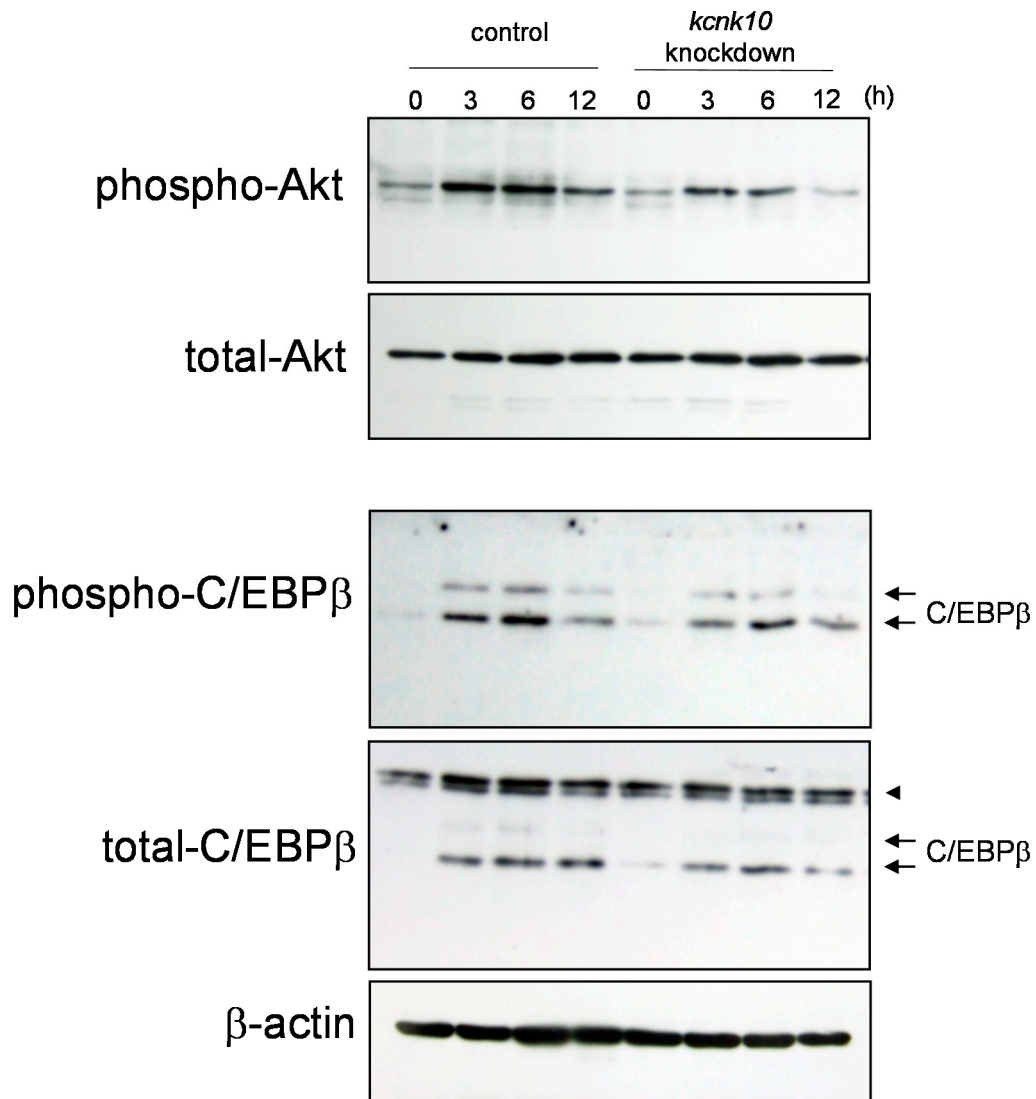

**Figure S4.** Effect of *kcnk10* knockdown on the protein level of C/EBP $\delta$  when used lot 4 samples. Arrowheads indicate nonspecific bands.

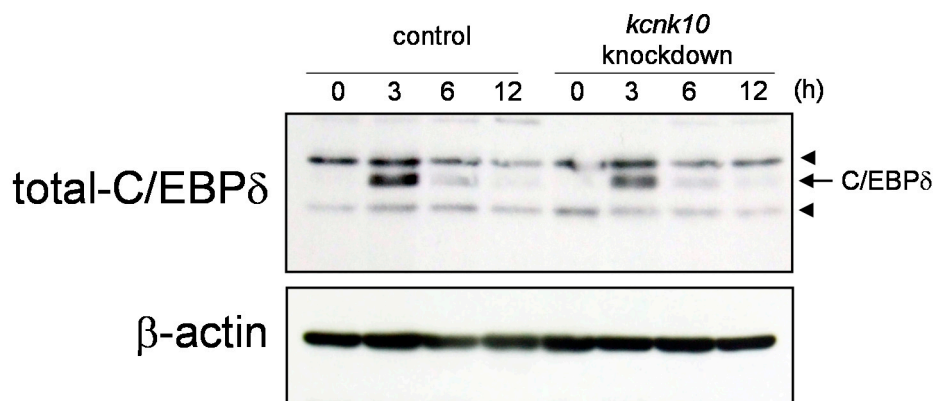

**Figure S5.** Effect of *kcnk10* knockdown on insulin-induced Akt phosphorylation.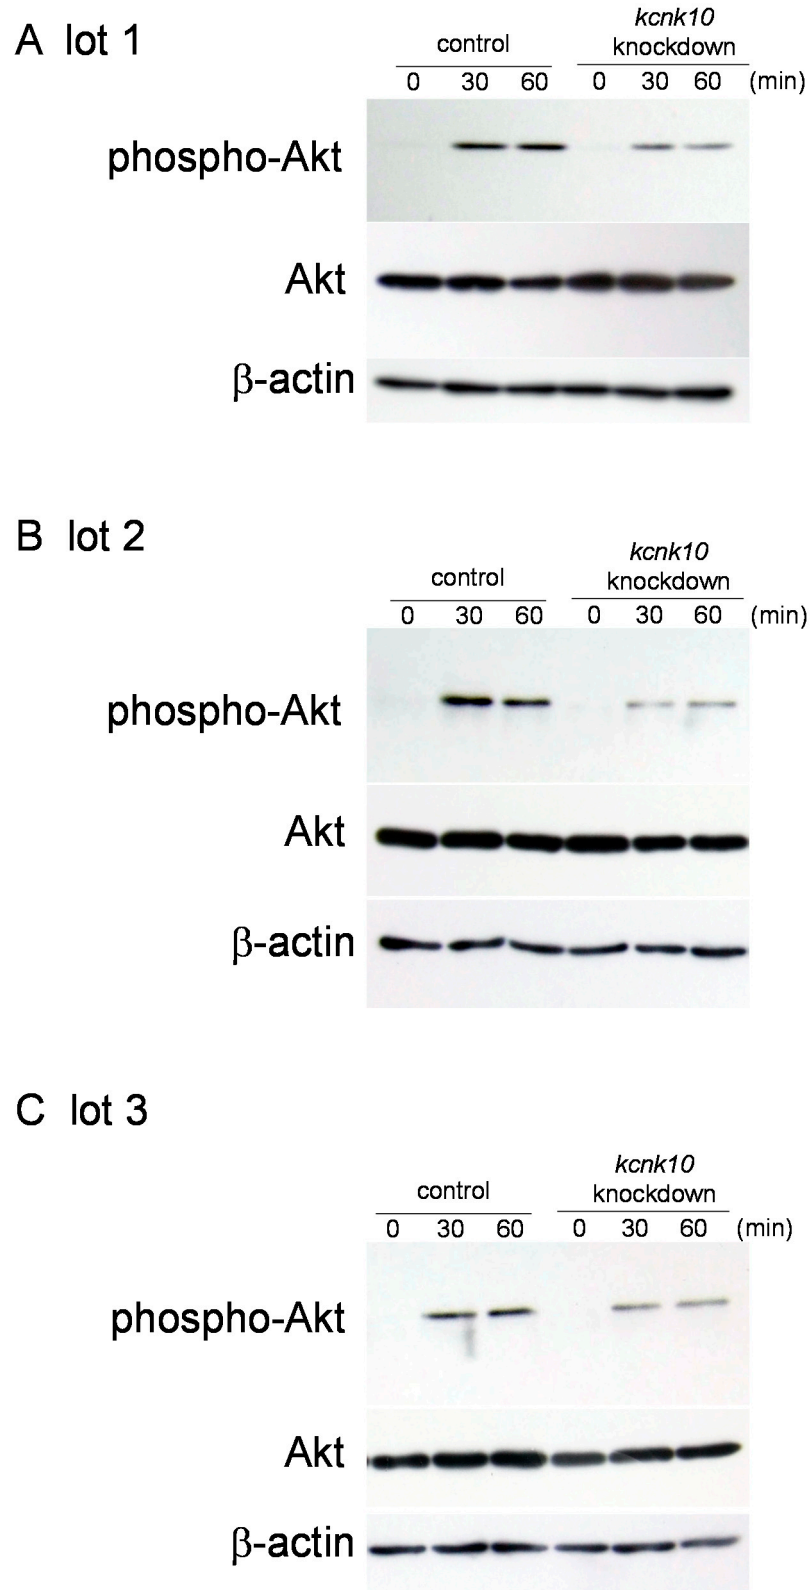

Supplement: s1 [file s1]
